# Supplementary material for: Physical Dormancy Release in Medicago truncatula Seeds Is Related to Environmental Variations
Source: MDPI journal article supplement (doi:10.3390/plants9040503), 2020-04-14
Supplement: s1 [file s1]

EMMAFarmCPUEMMAFarmCPUFPYD<sub>35</sub>FPYD<sub>25</sub>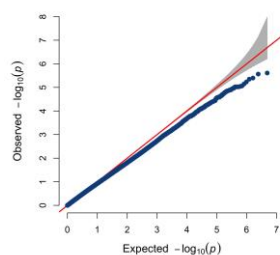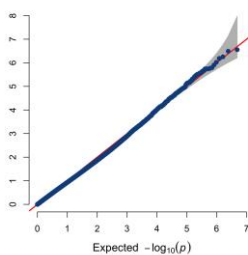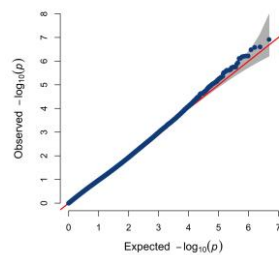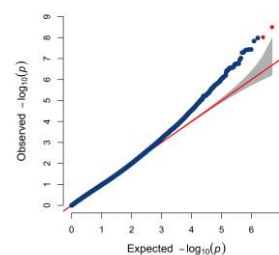AUC<sub>25</sub>AUC<sub>35</sub>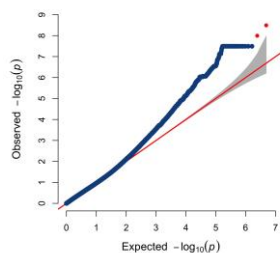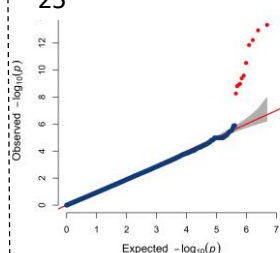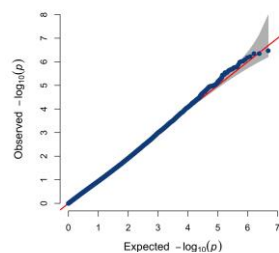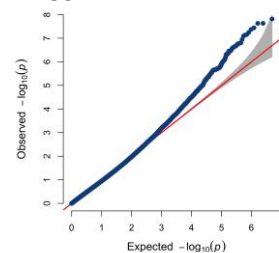PI<sub>py</sub>PI<sub>AUC</sub>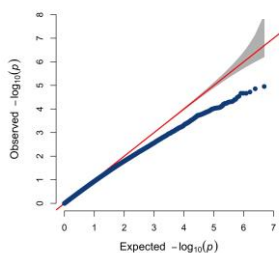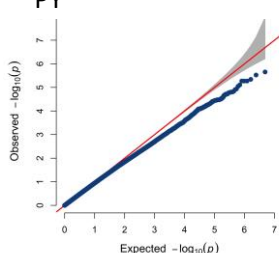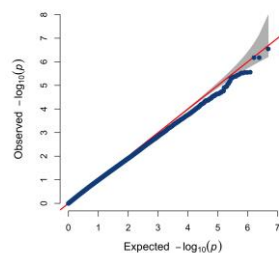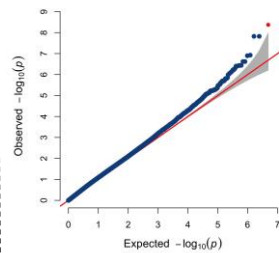AUC<sub>35-25</sub>

BIO\_1

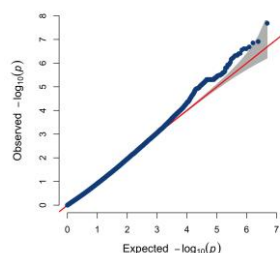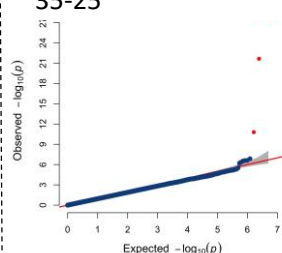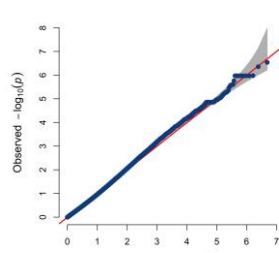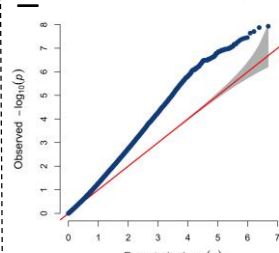

BIO\_9

BIO\_12

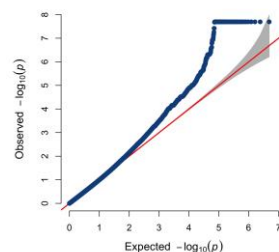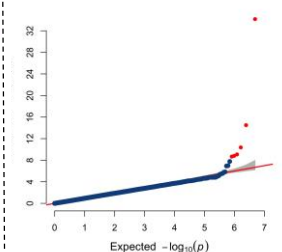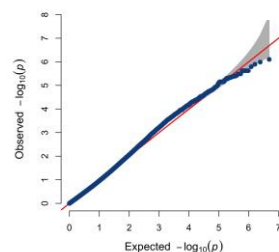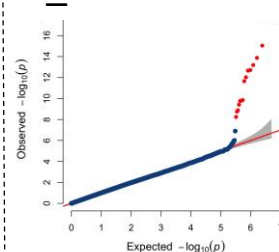

**Figure 8S :** Quantile–quantile (Q-Q) plots for all the traits obtained by standard mixed linear model (EMMA) and multi-locus linear model (FarmCPU). Observed  $-\log_{10}(\text{p-value})$  on the y-axis and Expected  $-\log_{10}(\text{p-value})$  on the x-axis.
