# Supplementary material for: Physical Dormancy Release in Medicago truncatula Seeds Is Related to Environmental Variations
Source: MDPI journal article supplement (doi:10.3390/plants9040503), 2020-04-14
Supplement: s1 [file s1]

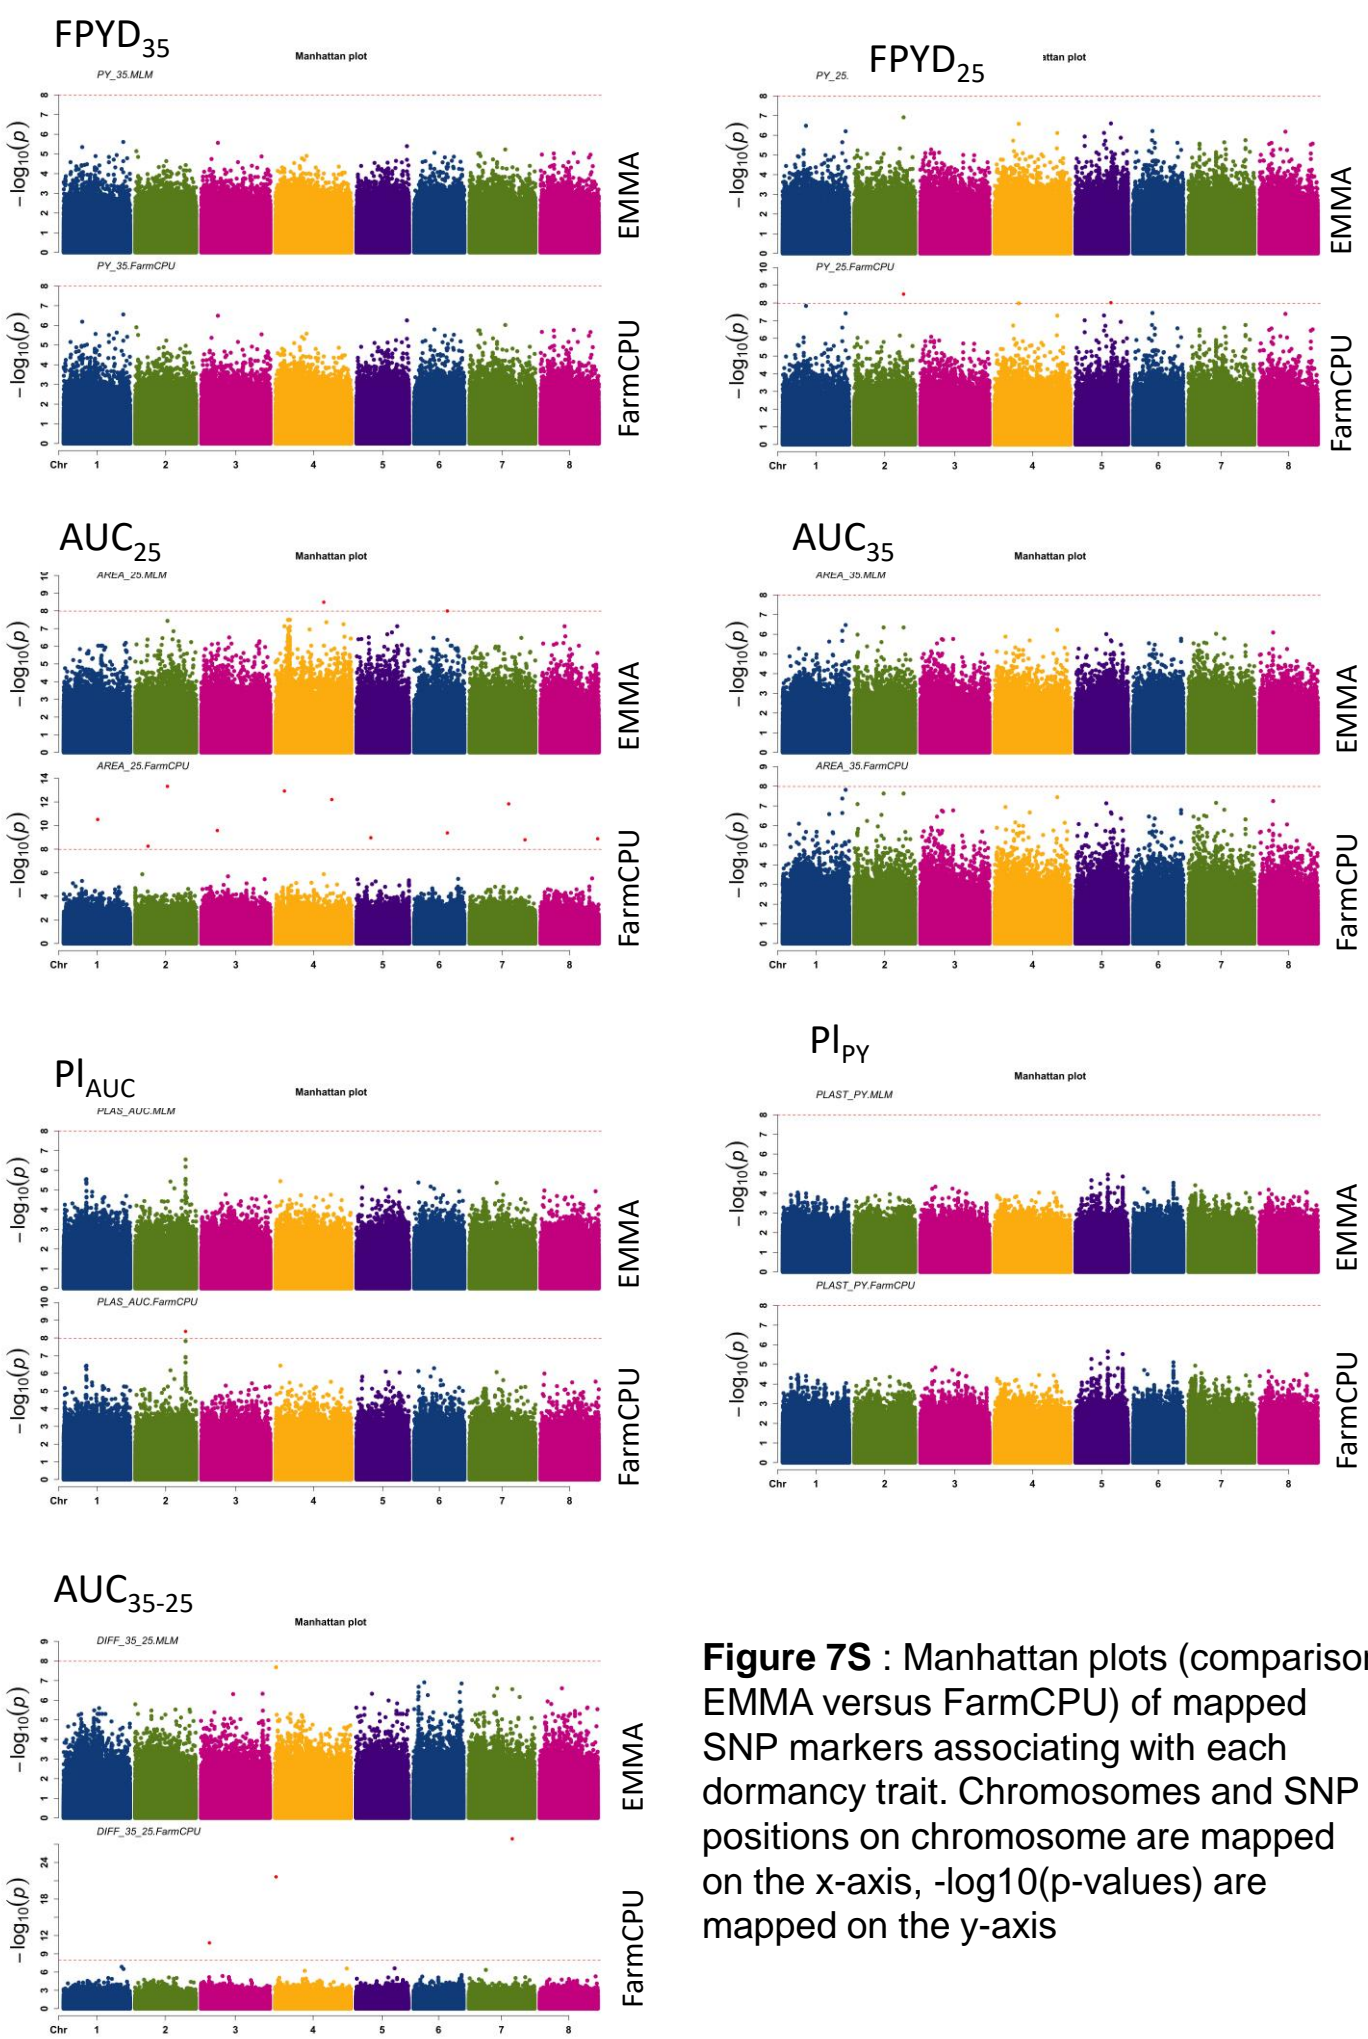

**Figure 7S** : Manhattan plots (comparison EMMA versus FarmCPU) of mapped SNP markers associating with each dormancy trait. Chromosomes and SNP positions on chromosome are mapped on the x-axis,  $-\log_{10}(p)$ -values are mapped on the y-axis

BIO\_1

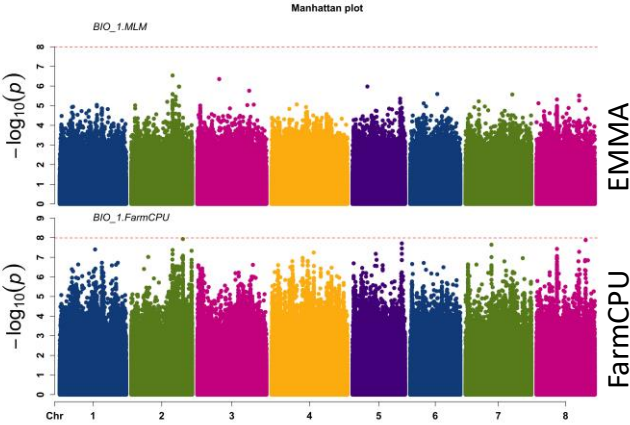

BIO\_9

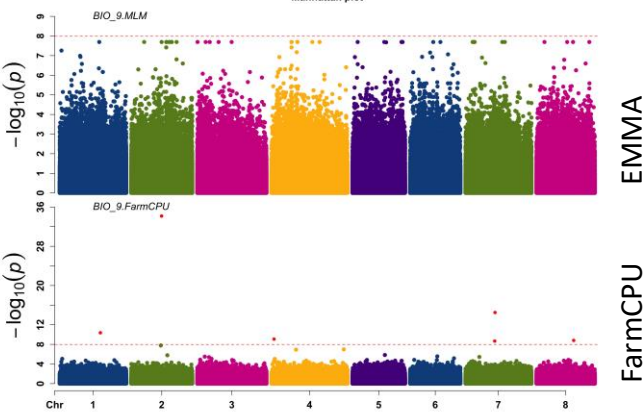

BIO\_12

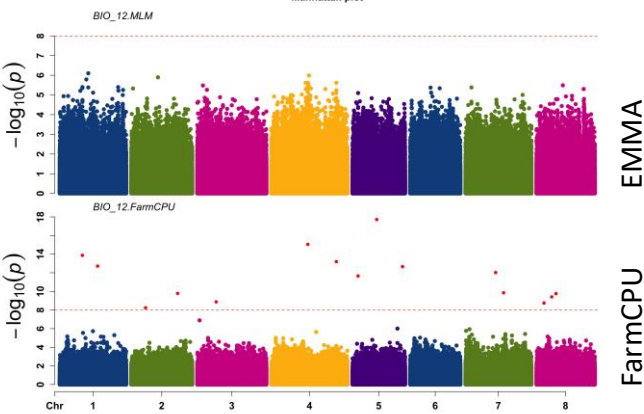

**Figure 7S** : Manhattan plots (comparison EMMA versus FarmCPU) of mapped SNP markers associating with each bioclimatic trait. Chromosomes and SNP positions on chromosome are mapped on the x-axis,  $-\log_{10}(p\text{-values})$  are mapped on the y-axis
