# Supplementary figures and images for: Physical Dormancy Release in Medicago truncatula Seeds Is Related to Environmental Variations
Source: MDPI journal article supplement (doi:10.3390/plants9040503), 2020-04-14

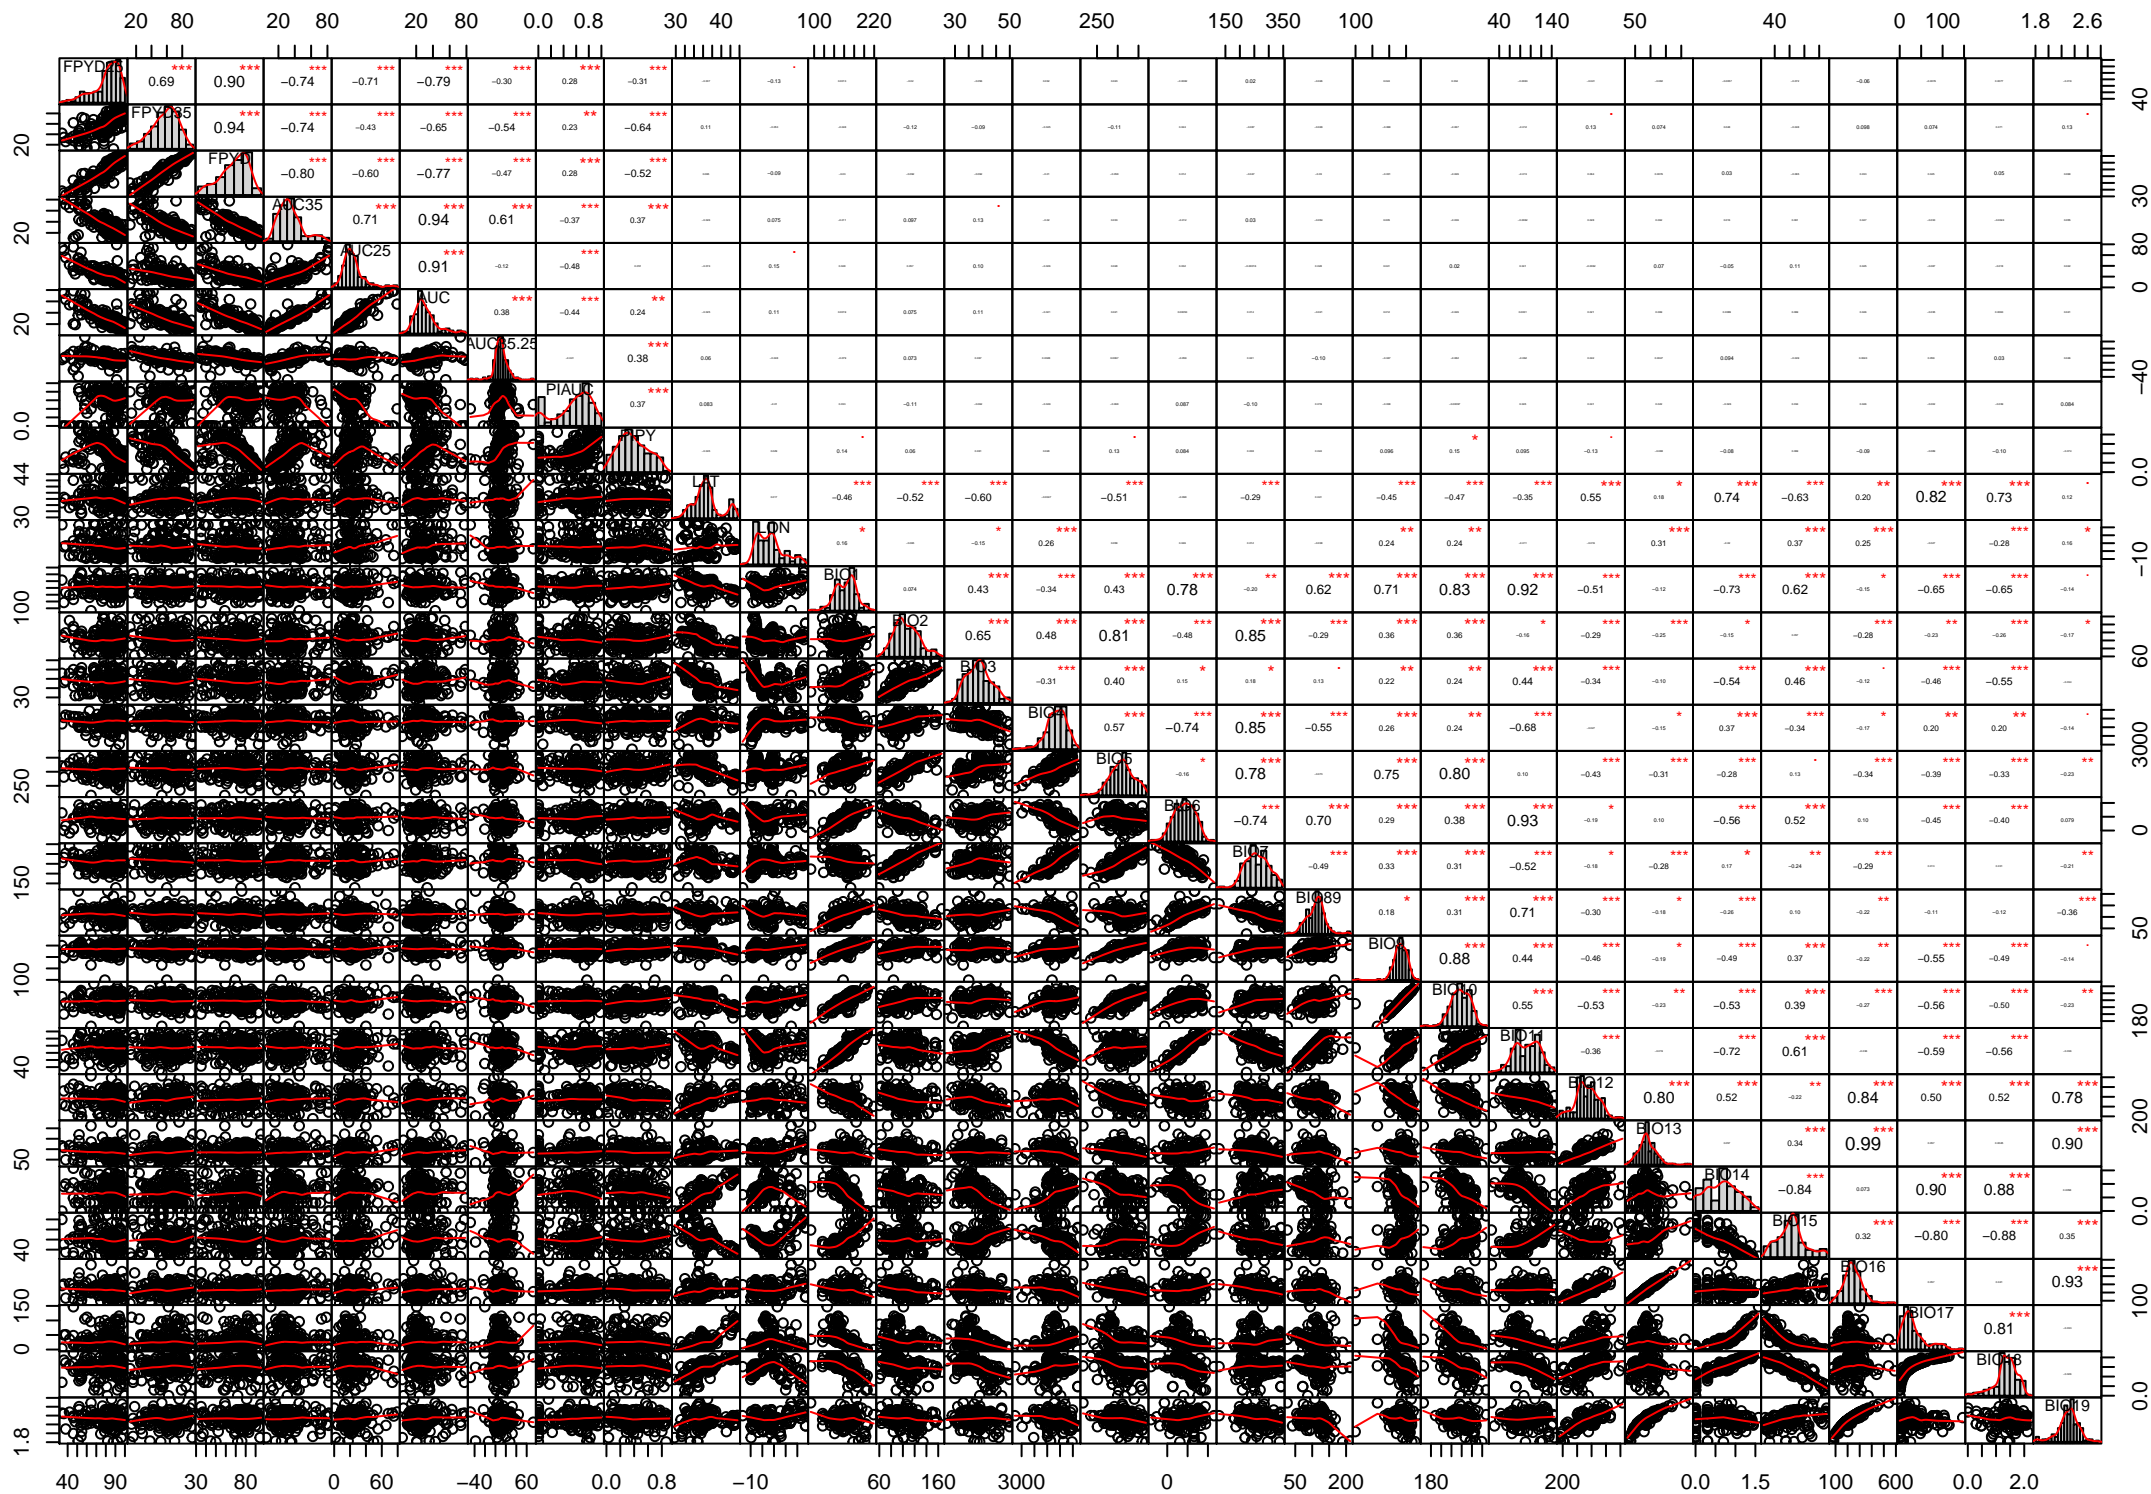

Supplement: s1 [file s1]

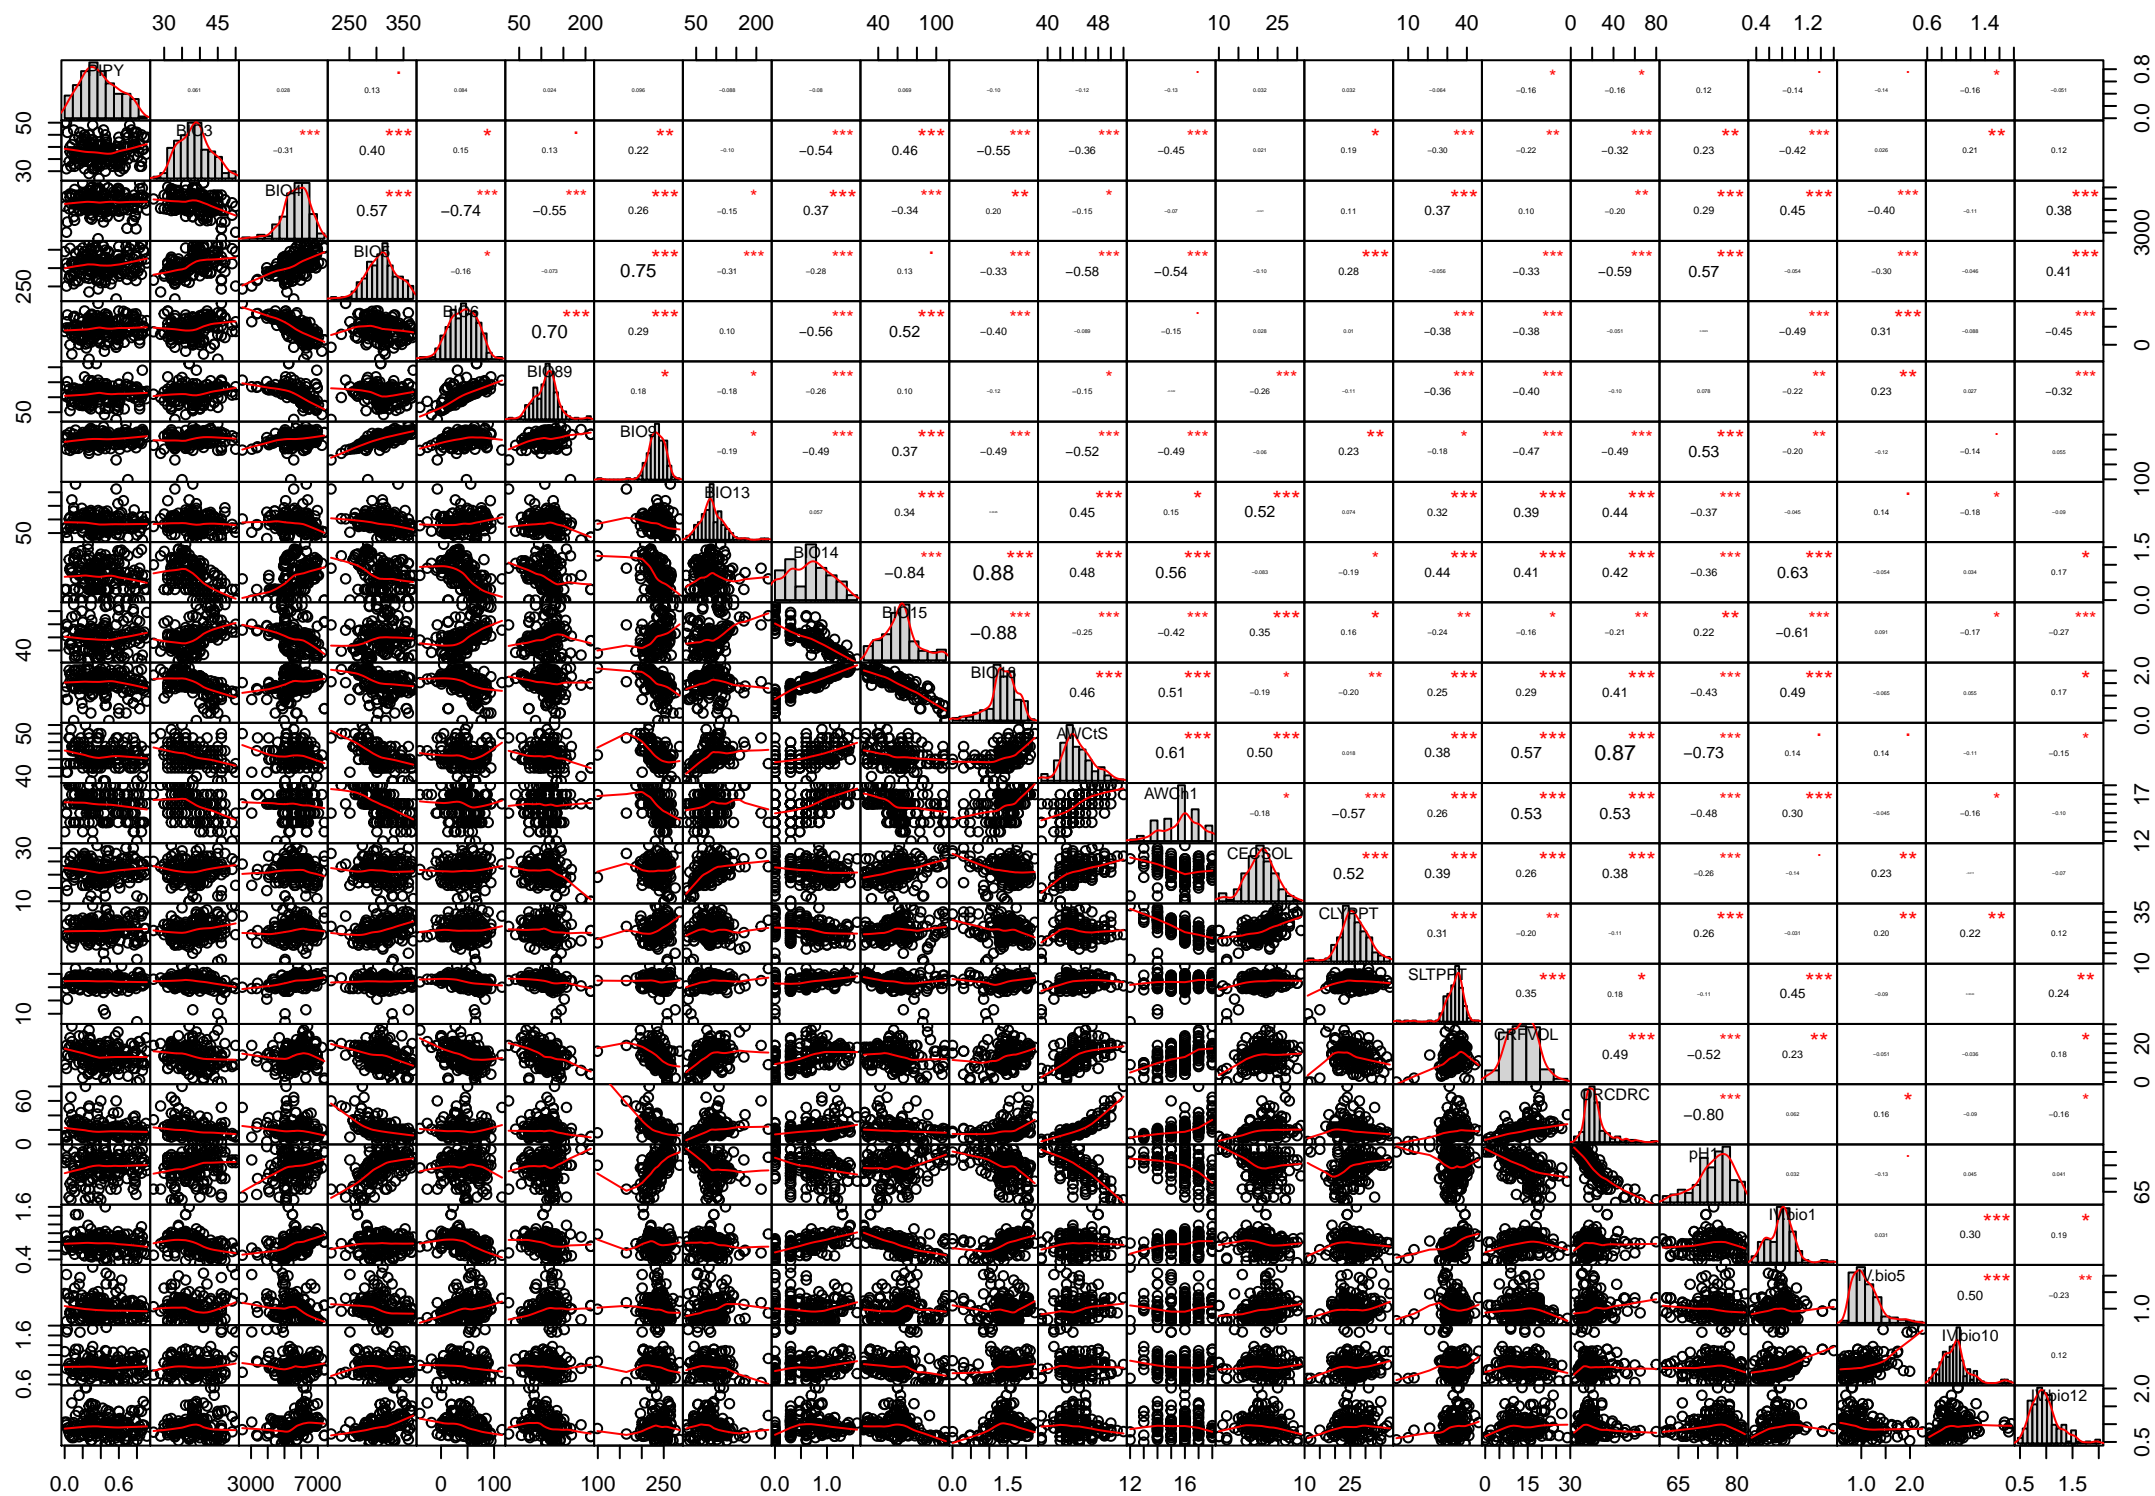

Supplement: s1 [file s1]

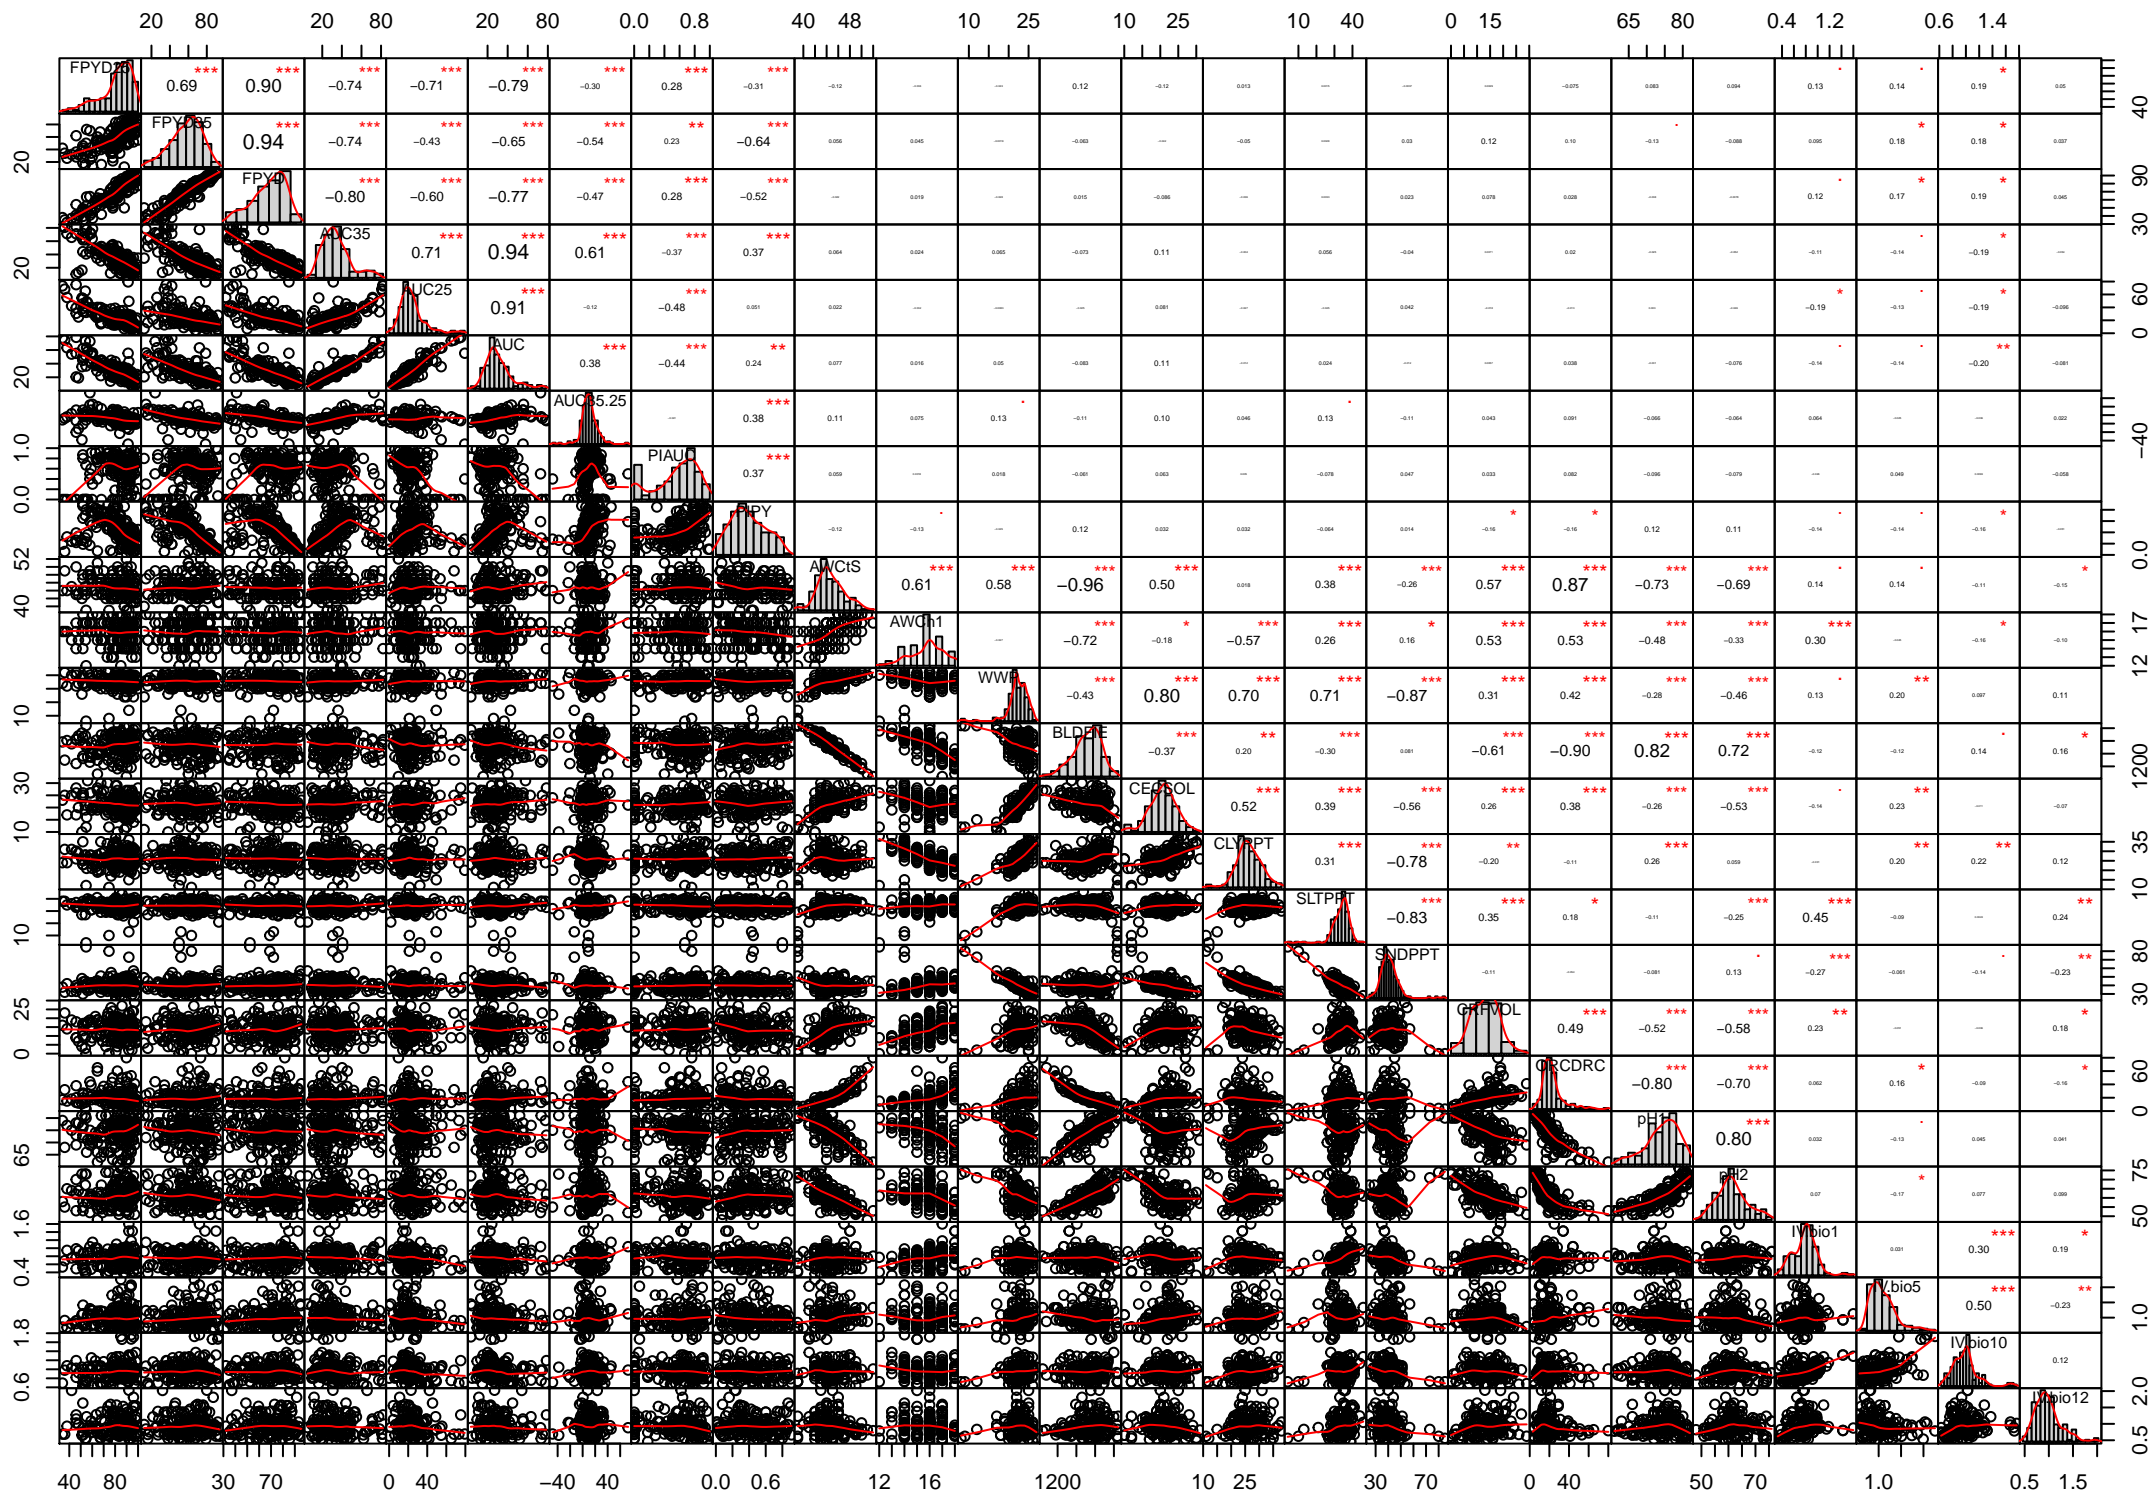

Supplement: s1 [file s1]
